# Supplementary material for: The role of H3K36 methylation and associated methyltransferases in chromosome-specific gene regulation
Source: PubMed Central journal article supplement — Sci Adv. 2021 Oct 1;7(40):eabh4390. doi: 10.1126/sciadv.abh4390 (PMC10938550; doi:10.1126/sciadv.abh4390), 2021-10-01
Supplement: sciadv.abh4390_sm.pdf [file sciadv.abh4390_sm.pdf]

Supplementary Materials for

**The role of H3K36 methylation and associated methyltransferases in  
chromosome-specific gene regulation**

Henrik Lindehell, Alexander Glotov, Eshagh Dorafshan,  
Yuri B. Schwartz\*, Jan Larsson\*

\*Corresponding author. Email: [jan.larsson@molbiol.umu.se](mailto:jan.larsson@molbiol.umu.se) (J.L.); [yuri.schwartz@umu.se](mailto:yuri.schwartz@umu.se) (Y.B.S.)

Published 1 October 2021, *Sci. Adv.* 7, eabh4390 (2021)  
DOI: 10.1126/sciadv.abh4390

**This PDF file includes:**

Figs. S1 to S6  
Table S1

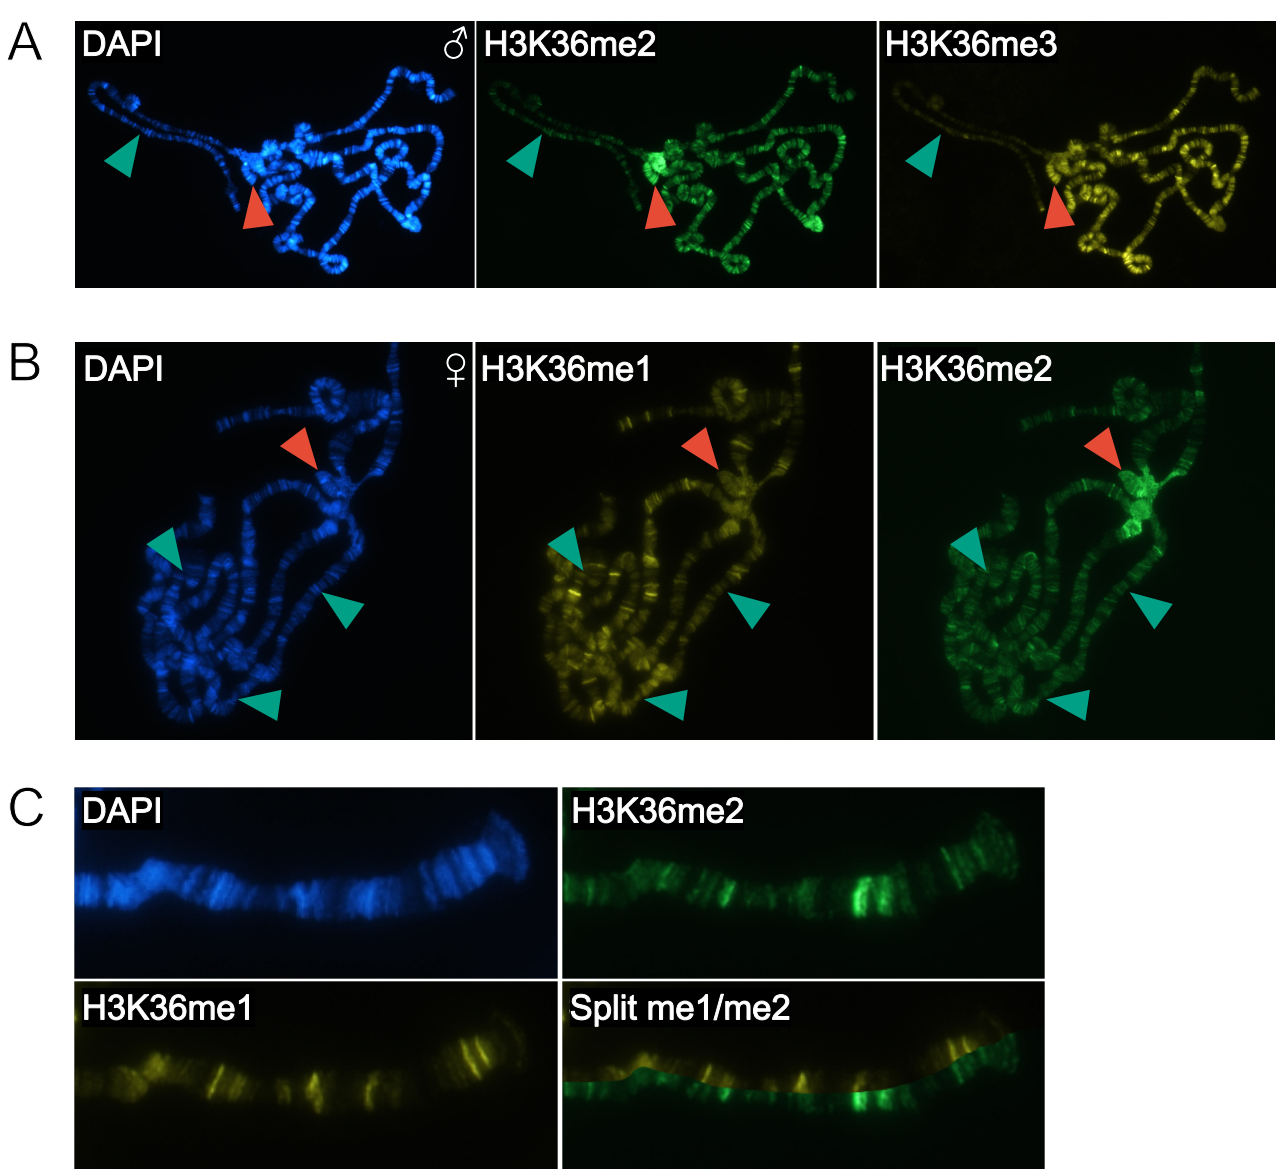

**Figure S1. Differential enrichments of methylated H3K36.** (A) Immunostaining of male third instar larvae polytene chromosomes showing H3K36me2 (green), H3K36me3 (yellow) and DAPI staining of DNA in blue. Note the accumulation of H3K36me2 in pericentromeric heterochromatin, H3K36me3 on the 4<sup>th</sup> chromosome and the reduced amount of H3K36me3 on the X-chromosome. (B) Immunostaining of female third instar larvae polytene chromosome showing H3K36me1 (yellow), H3K36me2 (green) and DAPI staining of DNA in blue. Note the accumulation of H3K36me2 in pericentromeric heterochromatin. Chromosome 4 is marked with red arrows and chromosome X with green arrows. (C) The H3K36me2 (green) staining shows only minor overlaps with H3K36me1 (yellow).

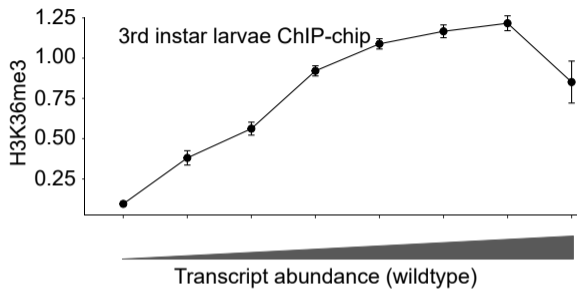

**Figure S2. Gene levels of H3K36me3 ChIP signal positively correlate with expression levels.** Third instar larvae ChIP-chip gene exon enrichment level (ChIP over input, log<sub>2</sub>) plotted against transcript abundance in wildtype male third instar larval brains as determined by the RNA-Seq experiment. Highly transcribed genes show a higher accumulation of H3K36me3 than do genes with lower transcript abundance.

# RPKM Expression Values

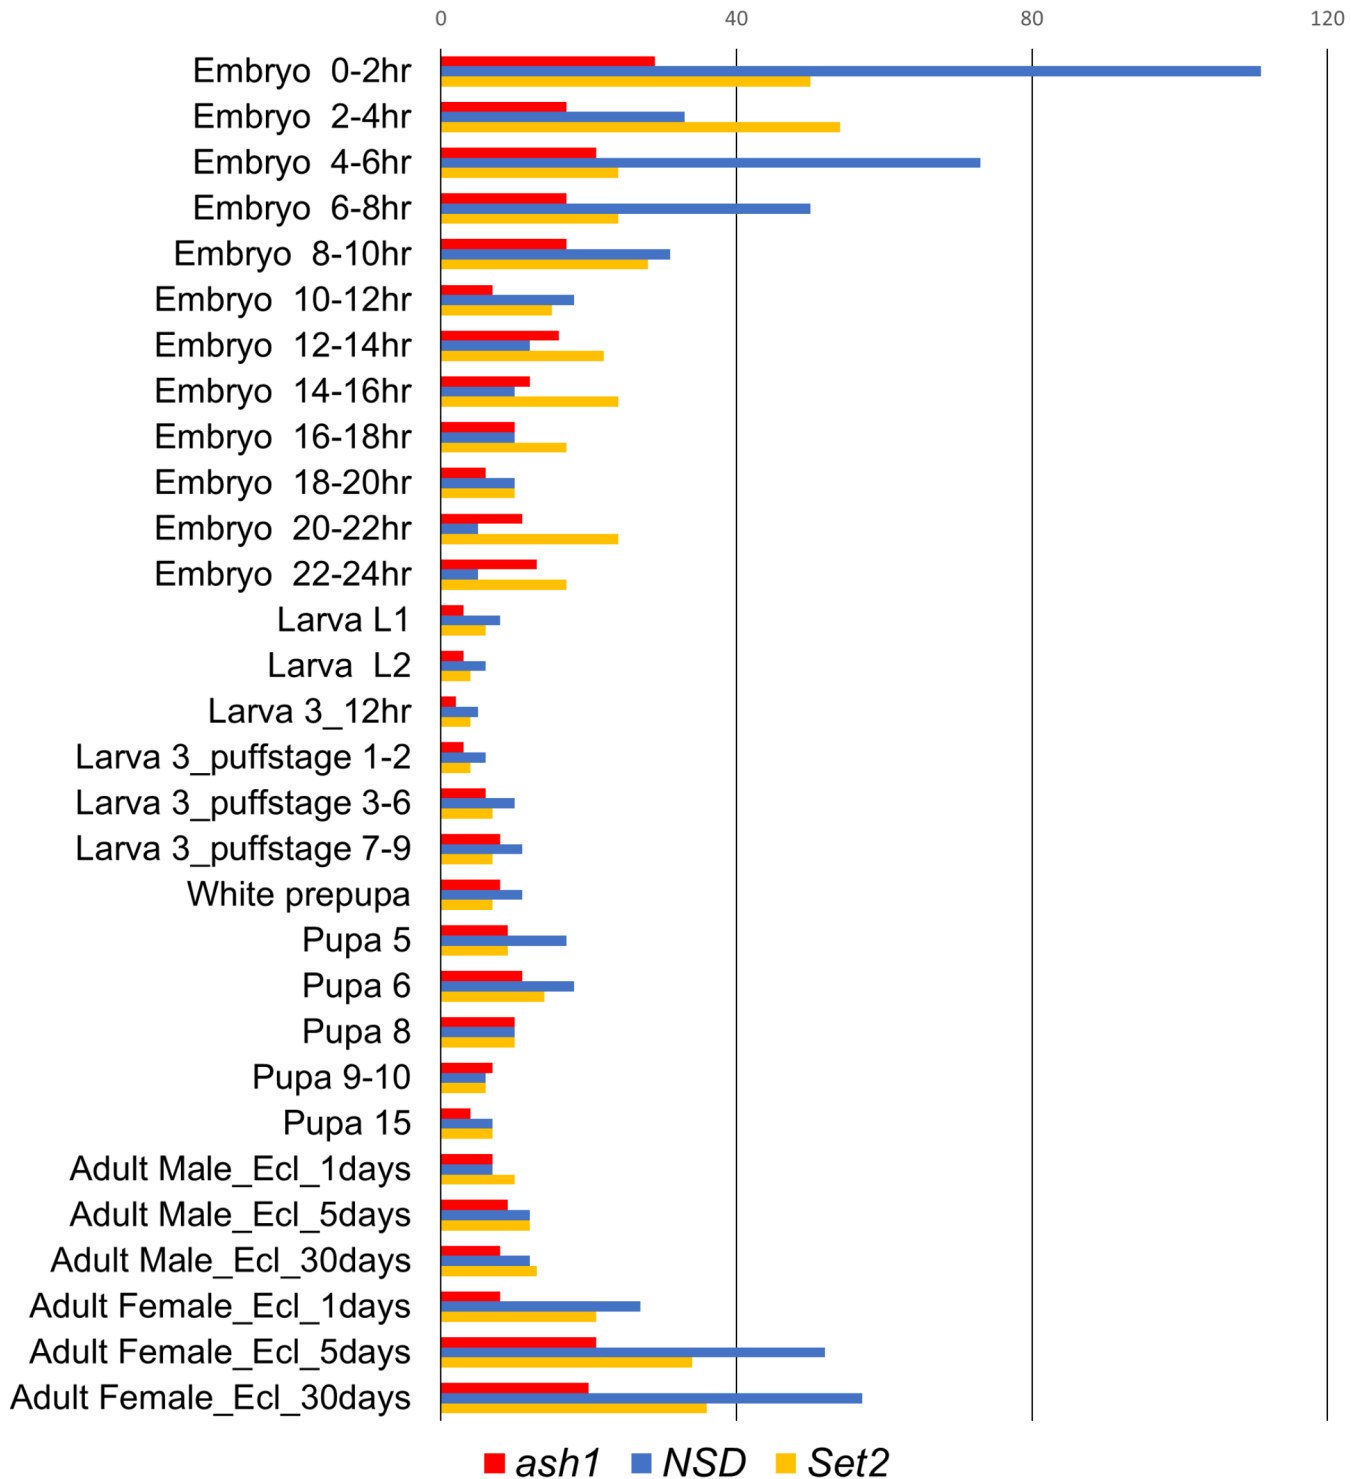

**Figure S3. *Set2*, *NSD* and *ash1* show similar developmental RNA profiles.** Developmental RNA profiles for *Set2*, *NSD* and *ash1* with the highest levels of RNA maternally contributed and in early embryo stages.

DAPI

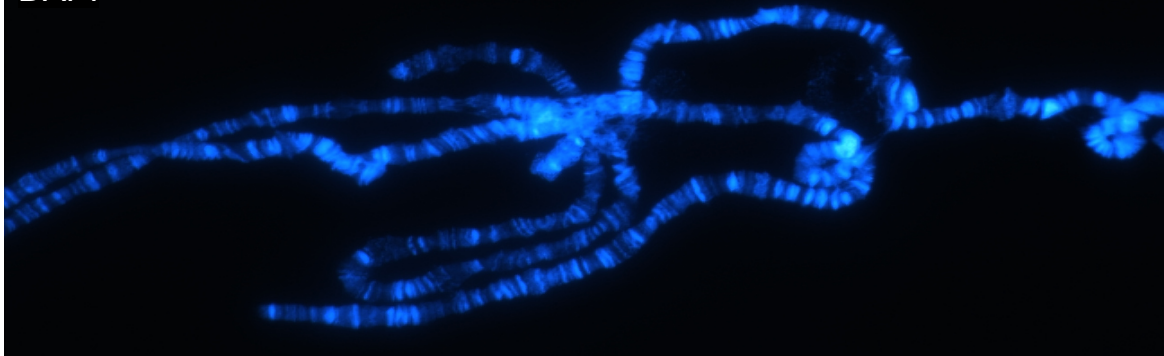

NSD

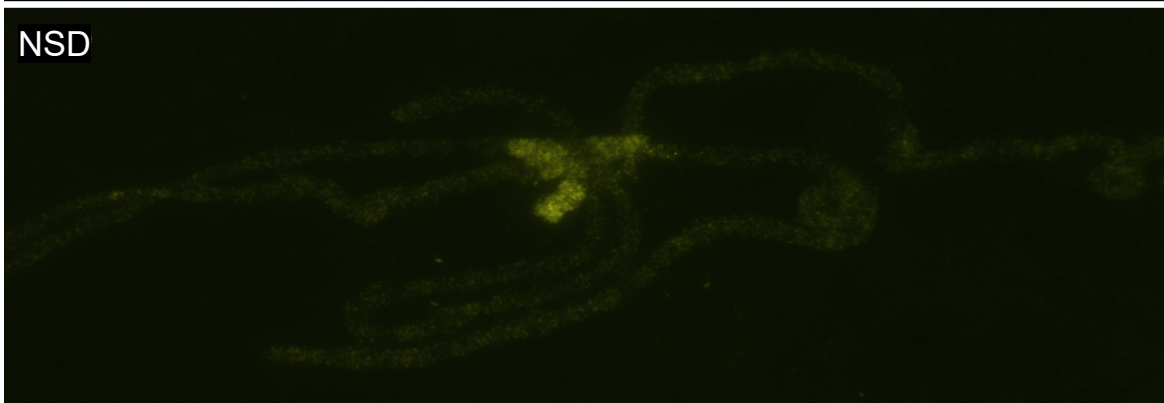

**Figure S4. NSD targets pericentric heterochromatin.** Immunostaining of third instar larvae polytene chromosome showing NSD (yellow), and DAPI staining of DNA in blue. Note the accumulation of NSD in pericentromeric heterochromatin and region 2L:31, similar to typical enrichments of HP1a.

Oregon R

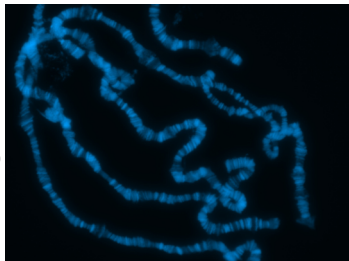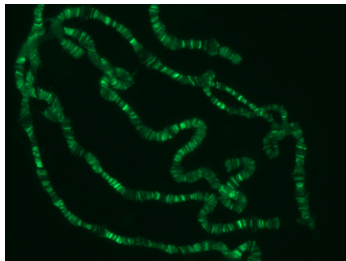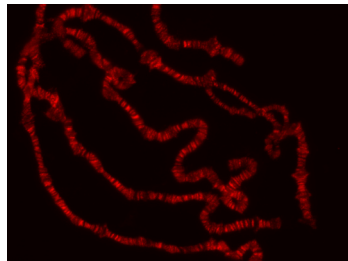

Set2<sup>1</sup>

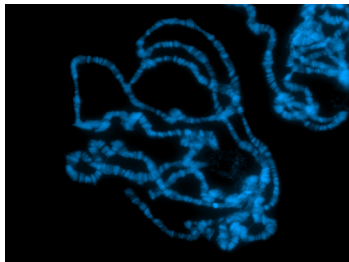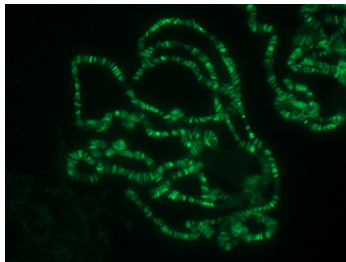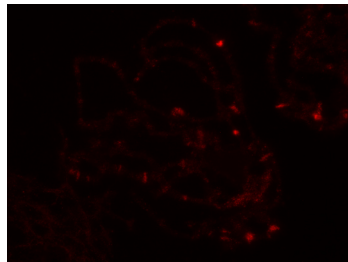

DAPI

BEAF-32

H3K36me3

**Figure S5. H3K36me3 is lost in Set2<sup>1</sup> mutants.** Staining of H3K36me3 in salivary glands for wildtype (top row) and Set2<sup>1</sup> (bottom row). Staining of BEAF-32 serves as an internal control.

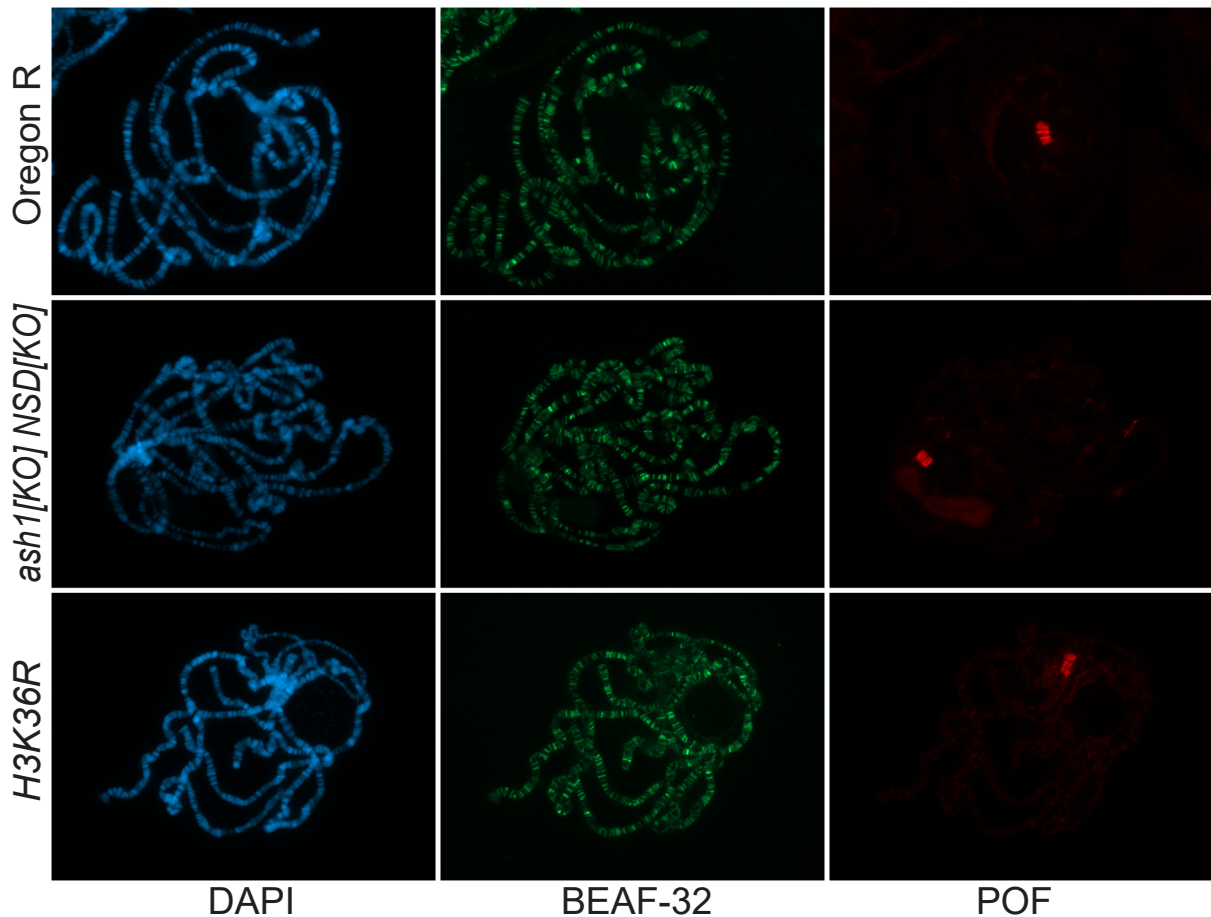

**Figure S6. POF binding to the 4<sup>th</sup> chromosome is unaltered in *ash1* *NSD* double mutants and in the *H3K36R* mutant.** Staining of POF in salivary glands for wildtype (top row), *ash1*<sup>122</sup> *NSD*<sup>ds46</sup>/*ash1*<sup>9011</sup> *NSD*<sup>ds46</sup> (middle row) and  $\Delta$ *HisC*; 12x<sup>H3K36R</sup> (bottom row). Staining of BEAF-32 serves as an internal control.

**Supplementary table S1: List of antibodies**

| Antigen                                                                                                     | Host              | Reference                      | Polytene chromosomes | Western   |
|-------------------------------------------------------------------------------------------------------------|-------------------|--------------------------------|----------------------|-----------|
| H3K36me3                                                                                                    | Rabbit monoclonal | Cell Signaling, D5A7, Cat#4909 | 1:200                | 1:2000    |
| H3K36me3                                                                                                    | Rabbit polyclonal | Abcam, ab9050                  | 1:200                | -         |
| H3K36me2                                                                                                    | Mouse monoclonal  | Active Motifs, MABI 0332       | 1:50                 | -         |
| H3K36me1                                                                                                    | Rabbit polyclonal | Abcam, ab9048                  | 1:100                | -         |
| NSD                                                                                                         | Mouse monoclonal  | (39)                           | 1:10                 | -         |
| POF                                                                                                         | Rabbit polyclonal | (19)                           | 1:400                | -         |
| BEAF-32                                                                                                     | Mouse monoclonal  | DHSB, anti-BEAF                | 1:5                  | -         |
| H3                                                                                                          | Rabbit polyclonal | Abcam, ab1791                  | -                    | 1:100 000 |
| Secondary Antibody to Rabbit IgG (H+L), Alexa Fluor® 555 conjugate                                          | Goat polyclonal   | Abcam, ab150078                | 1:500                | -         |
| Secondary Antibody to Mouse IgG (H+L) Highly Cross-Adsorbed Secondary Antibody, Alexa Fluor® 488 conjugate  | Donkey polyclonal | Invitrogen, A-21202            | 1:500                | -         |
| Secondary Antibody to Rabbit IgG (H+L) Highly Cross-Adsorbed Secondary Antibody, Alexa Fluor® 555 conjugate | Donkey polyclonal | Invitrogen, A-31572            | 1:500                | -         |
| Secondary Antibody to Mouse IgG (H+L) Highly Cross-Adsorbed Secondary Antibody, Alexa Fluor® 555            | Goat polyclonal   | Invitrogen, A-21424            | 1:500                | -         |
| Anti-Rabbit AP conjugated                                                                                   | Goat polyclonal   | Promega, S3731                 | -                    | 1:10000   |
| Anti-Mouse IgG AP conjugated                                                                                | Goat polyclonal   | Sigma, A3562                   | -                    | 1:10000   |
